# Supplementary material for: Structure–charge transport relationship of 5,15-dialkylated porphyrins
Source: Royal Society of Chemistry journal article supplement (doi:10.1039/c2cc31137b), 2012-01-01
Supplement: c2cc31137b.pdf [file c2cc31137b.pdf]

## Electronic Supplementary Information (ESI)

### Structure-charge transport relationship of 5,15-Dialkylated porphyrins

Li Zhou,<sup>a†</sup> Zong-Xiang Xu,<sup>b†</sup> Ye Zhou,<sup>b</sup> Yan Feng,<sup>a</sup> Xiang-Ge Zhou,<sup>a</sup>  
Hai-Feng Xiang,<sup>a\*</sup> V. A. L. Roy<sup>b\*</sup>

a[\*]Dr. Hai-Feng Xiang, Prof. Xiang-Ge Zhou, Li Zhou, Yan Feng  
Institute of Homogeneous Catalysis, College of Chemistry, Sichuan University,  
Chengdu, 610041, China. Tel: (+86) 28-8541-2290; Fax: (+86) 28-8541-2291;  
E-mail: xianghaifeng@scu.edu.cn

b[\*]Dr. V. A. L. Roy, Dr. Zong-Xiang Xu, Ye Zhou  
Department of Physics and Materials Science, City University of Hong Kong, Tat  
Chee Avenue, Kowloon, Hong Kong SAR Fax: +852-2788 7830; Tel: +852-3442  
2729; E-mail: [val.roy@cityu.edu.hk](mailto:val.roy@cityu.edu.hk)

† Authors contributed equally

#### Materials Synthesis:

**Synthesis of Dipyrromethane** Dipyrromethane was produced with slight modification according to the reported literature.<sup>1</sup> Paraformaldehyde (0.9 g, 30 mmol in formaldehyde) was suspended in 20 mL of absolute ethanol and the mixture was refluxed until clear solution appeared. After cooling down, 20-fold of pyrrole (42 mL, 600 mmol) and 1 L of freshly distilled CH<sub>2</sub>Cl<sub>2</sub> were added and the mixture was stirred for 5 min to assure that oxygen was removed. Catalyst BF<sub>3</sub>·O(Et)<sub>2</sub> (0.5 mL) was then added and stirred at room temperature under N<sub>2</sub> atmosphere in the darkness overnight. After finishing the reaction, removing the solvent under vacuum .excess pyrrole was distilled under reduced pressure. The crude product was purified by silica gel chromatography with an eluent of CH<sub>2</sub>Cl<sub>2</sub> /cyclohexane/Et<sub>3</sub>N, 100:50:1 and obtained 1.84 g (42%) of the colorless crystalline product.

**Synthesis of 5,15-Bis(ethyl) porphyrin (C<sub>2</sub>-Por)<sup>2</sup>** Propyl aldehyde (0.58 g, 10.00 mmol) and Dipyrromethane (1.44 g, 10.00 mmol) were added to a dry round-bottomed 2 L flask with 1 L CH<sub>2</sub>Cl<sub>2</sub> and degassed with a stream of N<sub>2</sub> for 30 min. BF<sub>3</sub>·O(Et)<sub>2</sub> (0.84 mL, 3.3 mmol) was then added, and the solution was stirred under N<sub>2</sub> at room temperature for 1 h and then DDQ (1.72 g, 7.60 mmol) was added. The mixture was stirred at room temperature for an additional 1 hour and then the

solvent was removed. Column chromatography (Silica, CH<sub>2</sub>Cl<sub>2</sub>:hexane = 1:2, V/V) afforded the porphyrin as the first moving band. Removal of the solvent under vacuum gave product as purple solid. The product was recrystallized with CHCl<sub>2</sub>/CH<sub>3</sub>OH and obtained the 5,15-Bis(ethyl) porphyrin as light purple crystal. Yield: 0.33 g, 18 %. <sup>1</sup>HNMR (400 MHz, CDCl<sub>3</sub>): δ 10.17 (s, 2 H), 9.60 (d, J=4.8 Hz, 4 H), 9.42 (d, J=4.8 Hz, 4 H), 5.08 (m, 4H), 2.19 (t, J=7.6 Hz, 6H), -2.92 (br s, 2 H). <sup>13</sup>CNMR (400MHz, CDCl<sub>3</sub>): d=147.1, 144.2, 132.0, 127.6, 120.1, 104.2, 22.7, 14.2 ppm. MALDI-TOF-MS: m/z=367.2. Elem. Anal. Calcd (%) for C<sub>24</sub>H<sub>22</sub>N<sub>4</sub>: C, 78.66; H, 6.05; N, 15.29. Found: C, 78.72; H, 6.07; N, 15.79.

**Synthesis of 5,15-Bis(n-butyl) porphyrin (C<sub>4</sub>-Por)** was prepared by a similar procedure as that used for C<sub>2</sub>-Por, but with pentanal (0.86 g, 10.00 mmol) and Dipyrromethane (1.44 g, 10.00 mmol) to obtained light purple crystal. Yield: 0.42 g, 20 %. <sup>1</sup>HNMR (400 MHz, CDCl<sub>3</sub>): δ 10.18 (s, 2 H), 9.60 (d, J=4.4 Hz, 4 H), 9.42 (d, J=4.4 Hz, 4 H), 5.04 (m, 4H), 2.57 (m, 4H), 1.87 (m, 4H), 1.17 (m, 6H), -2.91 (br s, 2 H). <sup>13</sup>CNMR (400MHz, CDCl<sub>3</sub>): d=147.5, 144.2, 131.9, 127.8, 118.8, 104.3, 40.7, 34.4, 23.7, 14.2 ppm. MALDI-TOF-MS: m/z=423.3. Elem. Anal. Calcd (%) for C<sub>28</sub>H<sub>30</sub>N<sub>4</sub>: C, 79.59; H, 7.16; N, 13.26 Found: C, 79.62; H, 7.18; N, 13.22.

**Synthesis of 5,15-Bis(n-hexyl) porphyrin (C<sub>6</sub>-Por)** was prepared by a similar procedure as that used for C<sub>2</sub>-Por, but with enanthal (1.14 g, 10.00 mmol) and Dipyrromethane (1.44 g, 10.00 mmol) to obtained purple solid. Yield: 0.41 g, 17 %. <sup>1</sup>HNMR (400 MHz, CDCl<sub>3</sub>): δ 10.14 (s, 2 H), 9.55 (d, J=4.4 Hz, 4 H), 9.39 (d, J=4.4 Hz, 4 H), 4.98 (m, 4H), 2.57 (m, 4H), 1.85 (m, 4H), 1.56 (m, 4H), 1.45 (m, 4H), 0.99 (m, 6H), -2.97 (br s, 2 H). <sup>13</sup>CNMR (400MHz, CDCl<sub>3</sub>): d=147.4, 144.1, 131.8, 127.7, 118.7, 104.2, 39.7, 34.6, 31.8, 30.3, 22.8, 14.2 ppm. MALDI-TOF-MS: m/z=479.3. Elem. Anal. Calcd (%) for C<sub>32</sub>H<sub>38</sub>N<sub>4</sub>: C, 80.29; H, 8.00; N, 11.70 Found: C, 80.32; H, 8.03; N, 11.65.

**Growth Single Crystal of C<sub>2</sub>-Por:** Methanol was carefully layered onto the dichloromethane solution of C<sub>2</sub>-Por. Slow diffusion over two weeks yielded light purple crystals.

**Growth Single Crystal of C<sub>4</sub>-Por:** Methanol was carefully layered onto the dichloromethane solution of C<sub>4</sub>-Por. Slow diffusion over two weeks yielded light purple crystals.

**Single Crystal X-ray Diffraction:** Small needle-shaped crystal (maximum dimensions <20 μm) of C<sub>2</sub>-Por, and C<sub>4</sub>-Por were mounted on glass fiber. All measurements were made on a X8 PROTEUM system with a MICROSTAR micro-focus copper rotation anode x-ray generator and a PLATINUM135 CCD detector at 100 K.

**Thermo Gravimetric Analysis (TGA):** A few milligrams of as synthesized porphyrins materials were loaded on an aluminum/platinum crucible. Weight loss of sample was recorded using a Perkin-Elmer TGA-7 analyzer in the temperature range

50-800 °C under a flowing N<sub>2</sub> stream.

**Atomic Force Microscopy (AFM):** Images of film surface morphology of as deposited films (50 nm) formed on SiO<sub>2</sub>/Si substrate made from porphyrin complexes were recorded using atomic force microscope (AFM, VEECO Multimode V) operating in the tapping mode.

**Grazing Incidence X-ray Diffraction (GIXRD):** Grazing incidence X-ray diffraction patterns of as-deposited films formed on SiO<sub>2</sub>/Si substrate were recorded using a Bruker D8 Advance ( $\theta/\theta$ ) diffractometer with a Göbel mirror attachment. Irradiation of the parallel CuK <sub>$\alpha$ 1,2</sub> X-ray beam was fixed at a grazing incident angle of 1.000° ( $\theta$ ) and the detector was independently moved to collect the diffraction data in  $2\theta$  range of 3-30° with a step-size of 0.02° ( $2\theta$ ) at a fixed speed of *ca* 5 second/step.

**Fabrication of Field-Effect Transistors and Charge Mobility Measurements:** A heavily doped silicon substrate was used as the gate electrode. A silicon dioxide dielectric layer (100 nm) was thermally grown on the silicon substrate. Image reversal photolithography followed by standard lift-off process was used to form the Ti/Au source/drain contact patterns. The fabricated field-effect transistors had a channel width  $W$  around 1000  $\mu\text{m}$  and a channel length  $L$  of 100  $\mu\text{m}$ . The bottom-contact field-effect transistors based on thin film samples (50 nm) of porphyrins were fabricated on the patterned SiO<sub>2</sub>/Si substrate by vacuum-deposition and measured according to standard method.<sup>3</sup>

**Table S1. Crystal data for X-ray structures of C<sub>2</sub>-Por and C<sub>4</sub>-Por**

| Compound name                                                         | C <sub>2</sub> -Por                                                                                                                                  | C <sub>4</sub> -Por                                                                                                                                |
|-----------------------------------------------------------------------|------------------------------------------------------------------------------------------------------------------------------------------------------|----------------------------------------------------------------------------------------------------------------------------------------------------|
| <b>Crystal system<br/>/Space group</b>                                | Monoclinic<br><i>P21/c</i>                                                                                                                           | Monoclinic<br><i>P21/c</i>                                                                                                                         |
| <b>Lattice<br/>Parameters</b>                                         | <i>a</i> = 13.1977 (4) Å<br><i>b</i> = 12.7229 (4) Å<br><i>c</i> = 11.5658 (4) Å<br>$\beta$ = 103.008 (2)°<br><i>V</i> = 1892.21 (11) Å <sup>3</sup> | <i>a</i> = 9.8980 (6) Å<br><i>b</i> = 9.3449 (6) Å<br><i>c</i> = 12.9197 (8) Å<br>$\beta$ = 107.261 (4)°<br><i>V</i> = 1141.20 (12) Å <sup>3</sup> |
| <b>Molecular<br/>Formular</b>                                         | C <sub>24</sub> H <sub>22</sub> N <sub>4</sub>                                                                                                       | C <sub>28</sub> H <sub>30</sub> N <sub>4</sub>                                                                                                     |
| <b>Molecular Weight</b>                                               | 366.46                                                                                                                                               | 422.56                                                                                                                                             |
| <b>Z</b>                                                              | 4                                                                                                                                                    | 2                                                                                                                                                  |
| <b>D<sub>c</sub>(gcm<sup>-3</sup>)</b>                                | 1.286                                                                                                                                                | 1.230                                                                                                                                              |
| <b><math>\mu</math>, mm<sup>-1</sup><br/>(CuK<math>\alpha</math>)</b> | 0.08                                                                                                                                                 | 0.07                                                                                                                                               |
| <b>F(000)</b>                                                         | 776                                                                                                                                                  | 452                                                                                                                                                |
| <b>Max 2<math>\theta</math>, °</b>                                    | 55°                                                                                                                                                  | 52.8°                                                                                                                                              |
| <b>Unique data</b>                                                    | 4303                                                                                                                                                 | 2312                                                                                                                                               |
| <b>Observed data<br/>[I &gt; 2<math>\sigma</math>(I)]</b>             | 3043                                                                                                                                                 | 1284                                                                                                                                               |
| <b>Parameters/restraints</b>                                          | 312/0                                                                                                                                                | 188/0                                                                                                                                              |
| <b>R<sub>1</sub>/wR<sub>2</sub><sup>[a]</sup></b>                     | 0.064, 0.212                                                                                                                                         | 0.074/0.283                                                                                                                                        |
| <b>Goodness of fit<br/>S</b>                                          | 1.00                                                                                                                                                 | 1.00                                                                                                                                               |
| <b>Residual peak<br/>/hole, eÅ<sup>-3</sup></b>                       | 0.27 e Å <sup>-3</sup><br>-0.27 e Å <sup>-3</sup>                                                                                                    | 0.29 e Å <sup>-3</sup><br>-0.23 e Å <sup>-3</sup>                                                                                                  |

[a]  $R = \frac{\sum ||F_o| - |F_c||}{\sum |F_o|}$  and  $R_w = \frac{[\sum w(|F_o| - |F_c|)^2]^{1/2}}{\sum w|F_o|^2}^{1/2}$  based on the number of observed data  $I > 2\sigma(I)$ .

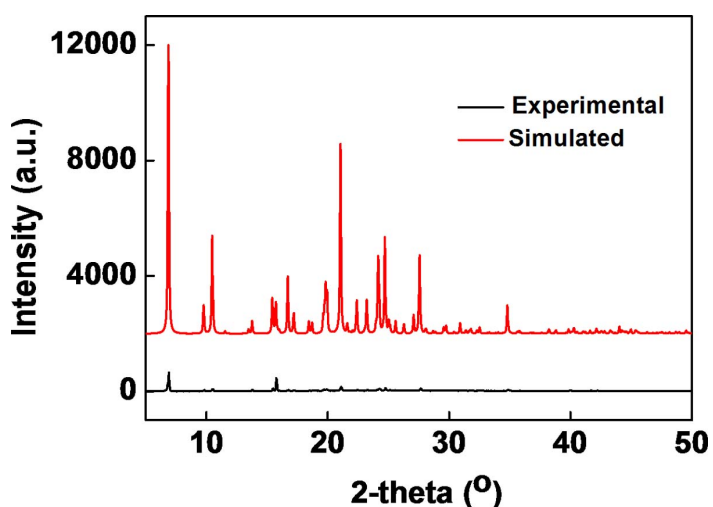

**Fig. S1** Experimental PXRD patterns of solid samples of C<sub>2</sub>-Por and simulated PXRD patterns calculated from the single crystal X-ray structures.

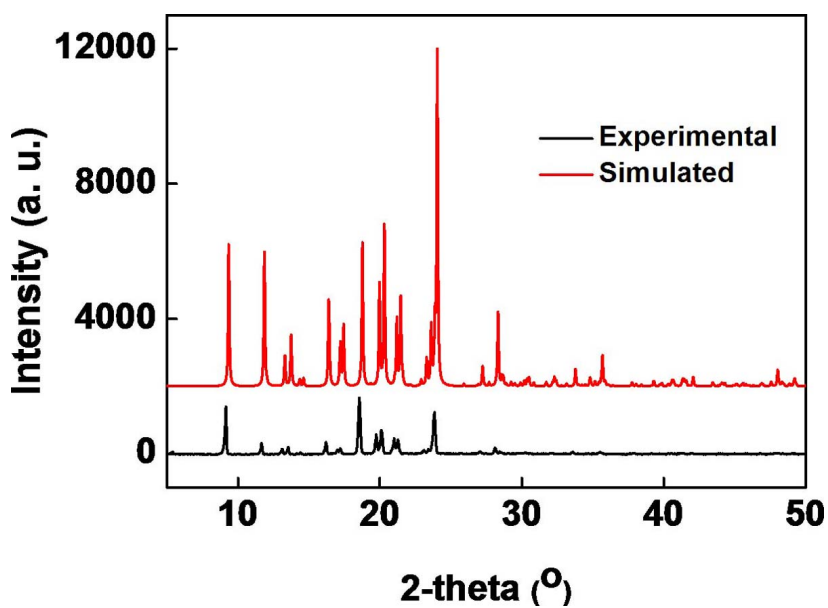

**Fig. S2** Experimental PXRD patterns of solid samples of C<sub>4</sub>-Por and simulated PXRD patterns calculated from the single crystal X-ray structures.

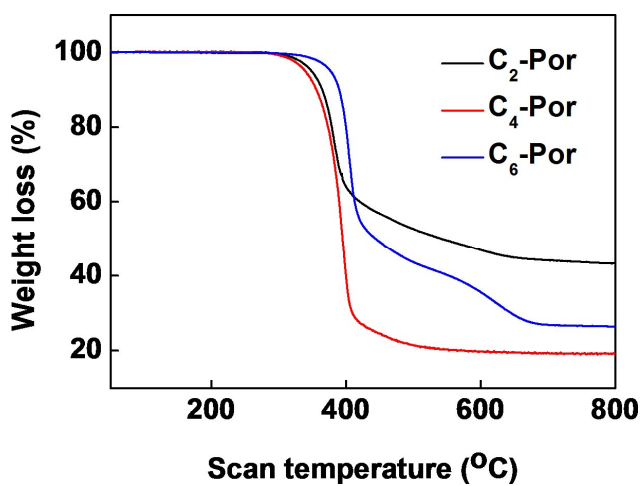

**Fig. S3** TGA curve of C<sub>n</sub>-Por (n=2, 4, and 6).

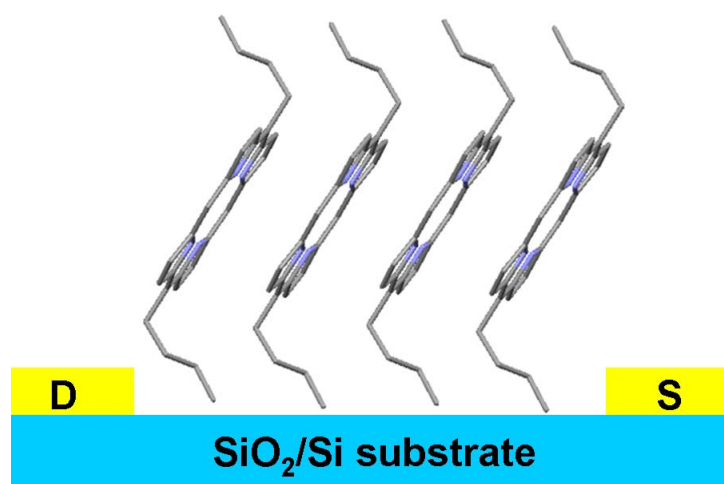

**Fig. S4** A schematic drawing of probable molecular alignment of Cn-Por compounds molecules in the films (C<sub>4</sub>-Por as example).

#### Reference

- 1 (a) Q. M. Wang and D. W. Bruce, *Synlett*, 1995, 1267; (b) S. Wu, Z. Li, L. G. Ren, B. Chen, F. Liang, X. Zhou, T. Jia and X. P. Cao, *Bioorg. Med. Chem.*, 2006, **14**, 2956.
- 2 J. S. Lindsey and R. W. Wagner, *J. Org. Chem.*, 1989, **54**, 828.
- 3 K. H. Low, Z. X. Xu, H. F. Xiang, S. S. Y. Chui, V. A. L. Roy and C. M. Che, *Chem. Asian J.*, 2011, **6**, 3223 .
